# Supplementary material for: Estimating genotype error rates from high-coverage next-generation sequence data
Source: HighWire-hosted journal article supplement (doi:10.1101/gr.168393.113), 2014-10-10
Supplement: Supplemental_Figures_Tables.pdf [file Supplemental_Figures_Tables.pdf]

**Table S1.** Discordance rates (%) between Illumina WGS and WES data from the same individual

|                     | IL blood (WGS) | IL saliva (WGS) |
|---------------------|----------------|-----------------|
| IL blood Agilent    | 0.12           | 0.11            |
| IL blood Nimblegen  | 0.17           | 0.16            |
| IL saliva Agilent   | 0.12           | 0.11            |
| IL saliva Nimblegen | 0.20           | 0.18            |

**Overall discordance:**

|                  |       |
|------------------|-------|
| Same tissue      | 0.149 |
| Different tissue | 0.152 |

**Table S2.** Total number of discordant sites and discordance rate for SNV's (with GQ  $\geq$  40) called in WGS, Agilent WES and Nimblegen WES data sets from the same individual and tissue type.

|                 | <b>Blood</b> | <b>Saliva</b> | <b>Discordance rate</b> |
|-----------------|--------------|---------------|-------------------------|
| <b>WGS</b>      | 33           | 41            | 1.36E-04                |
| <b>Agil WES</b> | 331          | 340           | 1.23E-03                |
| <b>Nimb WES</b> | 278          | 357           | 1.16E-03                |
| <b>Sites</b>    | 274866       | 270885        |                         |

**Table S3.** Examples of how particular variants are classified (for Figure 5). In all cases, we assume the reference allele to be A. Uncalled genotypes are denoted by NN. Platform specific fixed differences are further subdivided into ones where the two IL samples have the non-reference genotype (IL variant) and ones where the two CG samples have the non-reference genotype (CG variant). See text for further discussion of these.

| IL blood genotype | IL saliva genotype | CG blood genotype | CG saliva genotype | Called as                         |
|-------------------|--------------------|-------------------|--------------------|-----------------------------------|
| AA                | AA                 | AA                | AG                 | False positive (CG sal)           |
| AG                | AG                 | AA                | AG                 | False negative (CG bld)           |
| AG                | AT                 | AG                | AG                 | Miscall (IL sal)                  |
| AG                | AG                 | AA                | AA                 | Platform specific FD (IL variant) |
| AA                | AA                 | AG                | AG                 | Platform specific FD (CG variant) |
| AA                | AG                 | AG                | AA                 | Other                             |
| NN                | AA                 | AA                | AG                 | Platform specific error (CG)      |
| AA                | AG                 | AG                | GG                 | Excluded*                         |

\* Sites with more than two observed genotypes are excluded from the analyses

**Table S4.** Genotype discordance rates for platform-specific fixed differences, stratified by minor allele frequency (MAF)

|                               | IL-variant       | CG-variant       |
|-------------------------------|------------------|------------------|
| Overall                       | $2.85 * 10^{-4}$ | $4.32 * 10^{-3}$ |
| MAF < 0.01                    | $1.02 * 10^{-2}$ | 0.168            |
| $0.01 \leq \text{MAF} < 0.05$ | $1.43 * 10^{-4}$ | $1.61 * 10^{-3}$ |
| MAF $\geq 0.05$               | $6.77 * 10^{-5}$ | $7.16 * 10^{-4}$ |

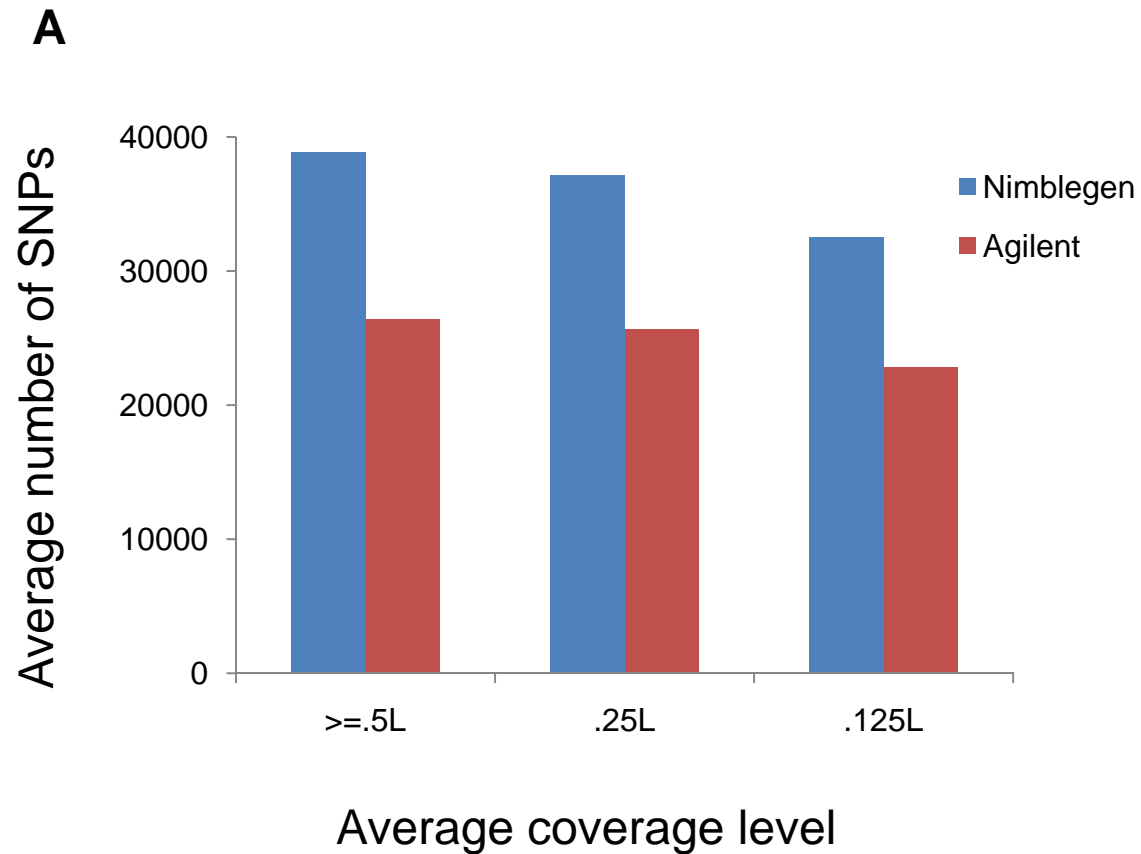

**Figure S1.** Average number of SNPs called per sample (**A**) and discordance rate (**B**) for exome data, stratified by average coverage level (xL refers to x lanes of coverage).

**B**

## Average coverage level

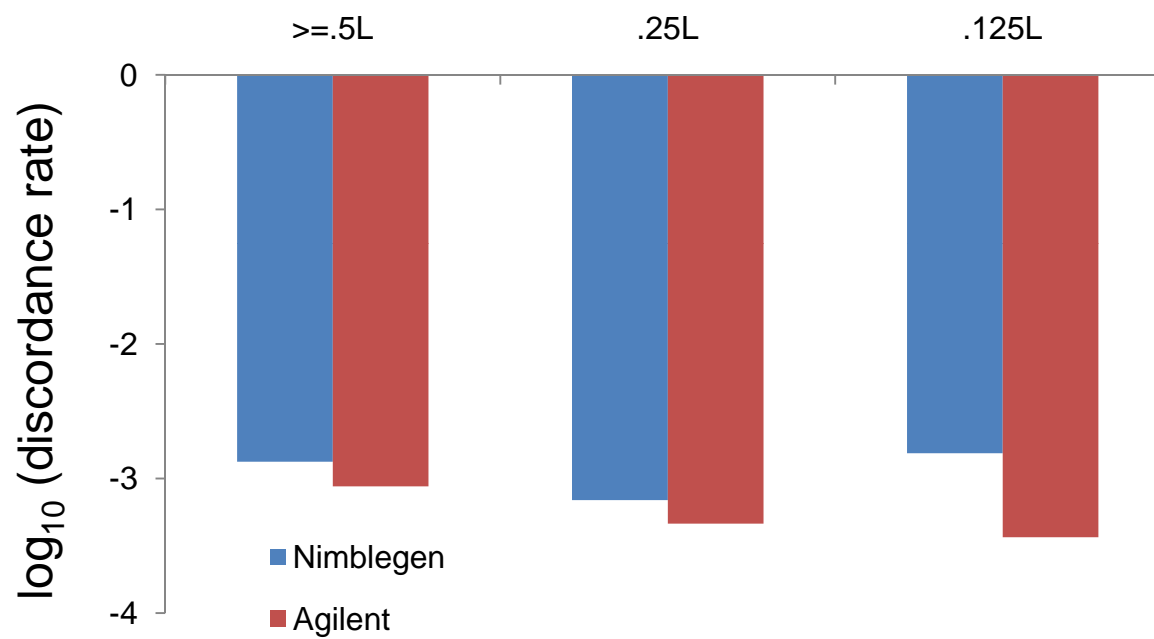

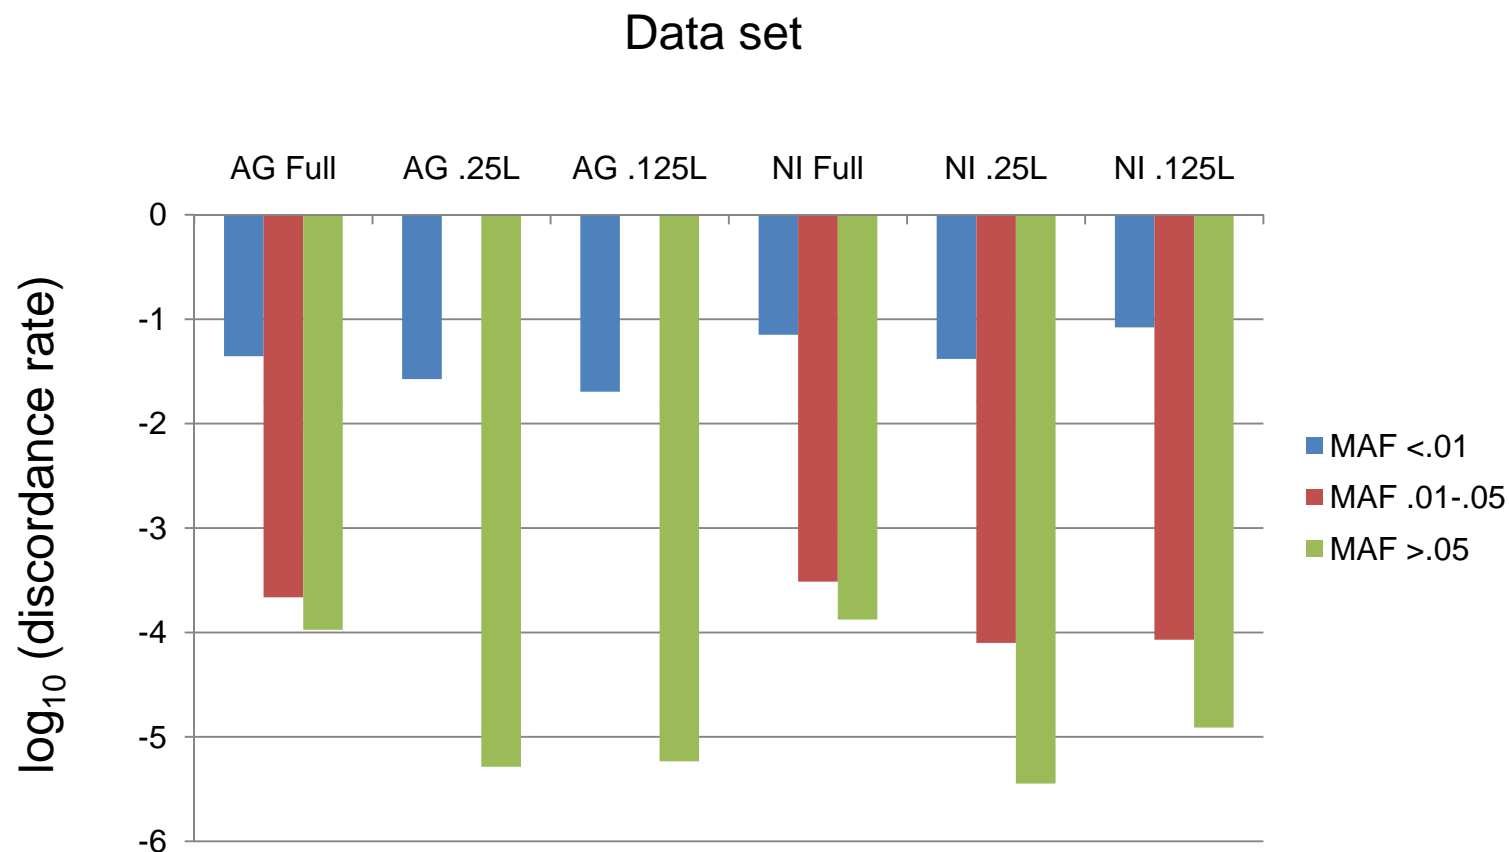

**Figure S2.** Discordance rate for exome data stratified by minor allele frequency (MAF) for different capture arrays (AG = Agilent, NI = Nimblegen) and levels of coverage (.25L refers to .25 lanes of coverage, etc.)

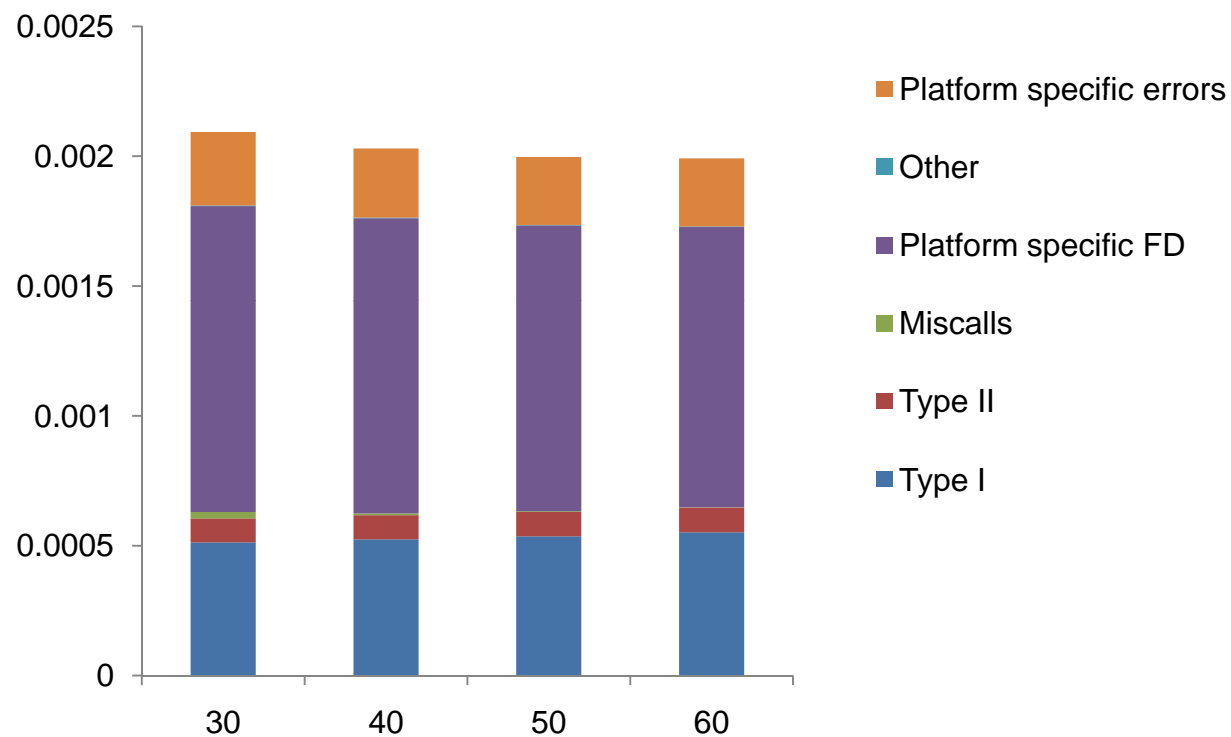

**Figure S3.** Total error rate for Illumina WGS data with different GQ cutoffs (x-axis). The six different colors represent the 6 different error types described in the main text.
